# Supplementary material for: Fabrication of a non-enzymatic Ni(ii) loaded ZSM-5 nanozeolite and multi-walled carbon nanotubes paste electrode as a glucose electrochemical sensor
Source: Royal Society of Chemistry journal article supplement (doi:10.1039/c5ra20622g), 2015-01-01
Supplement: c5ra20622g1.pdf [file c5ra20622g1.pdf]

**Supporting Information:**

**Fabrication of non-enzymatic Ni(II) loaded ZSM-5 nanozeolite and multi-walled carbon  
nanotubes paste electrode as glucose electrochemical sensor**

**Seyed Karim Hassaninejad-Darzi**

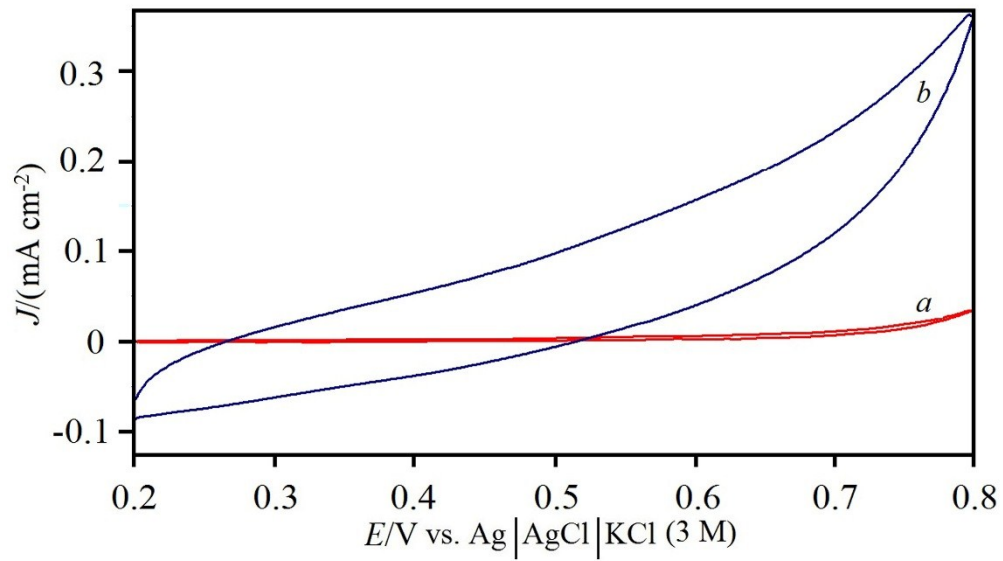

**Fig. S1** The cyclic voltammograms of (a) MW/CPE and (b) ZSM-5/CPE in 0.1 M NaOH before immersion in 0.5 M  $\text{NiCl}_2$  solution.

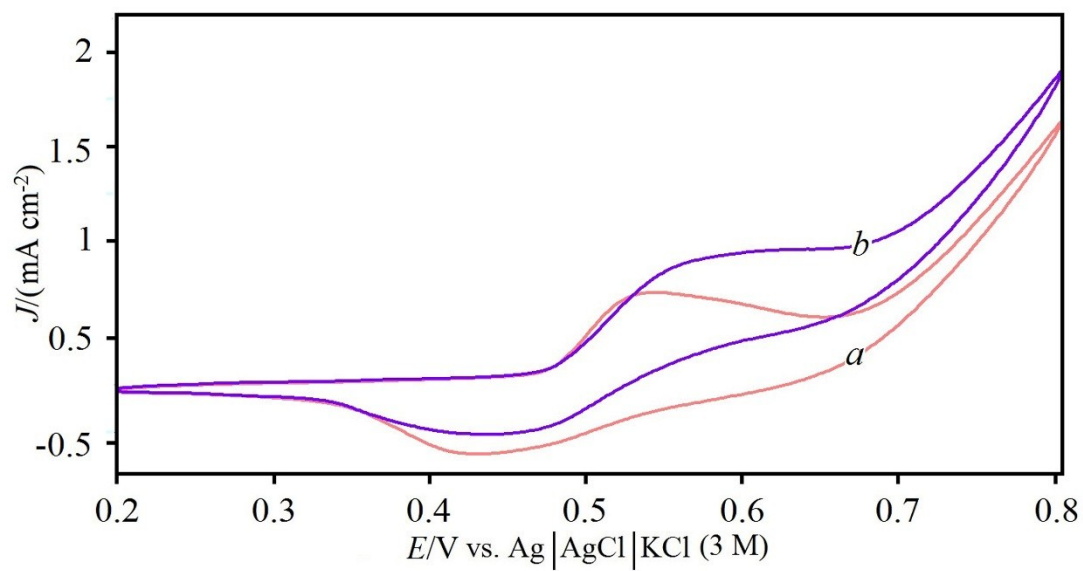

**Fig. S2** The cyclic voltammograms of Ni-MW/CPE (*a*) in the absence and (*b*) in the presence of 0.005 M glucose in 0.1 M NaOH at scan rate of 20 mV s<sup>-1</sup>.

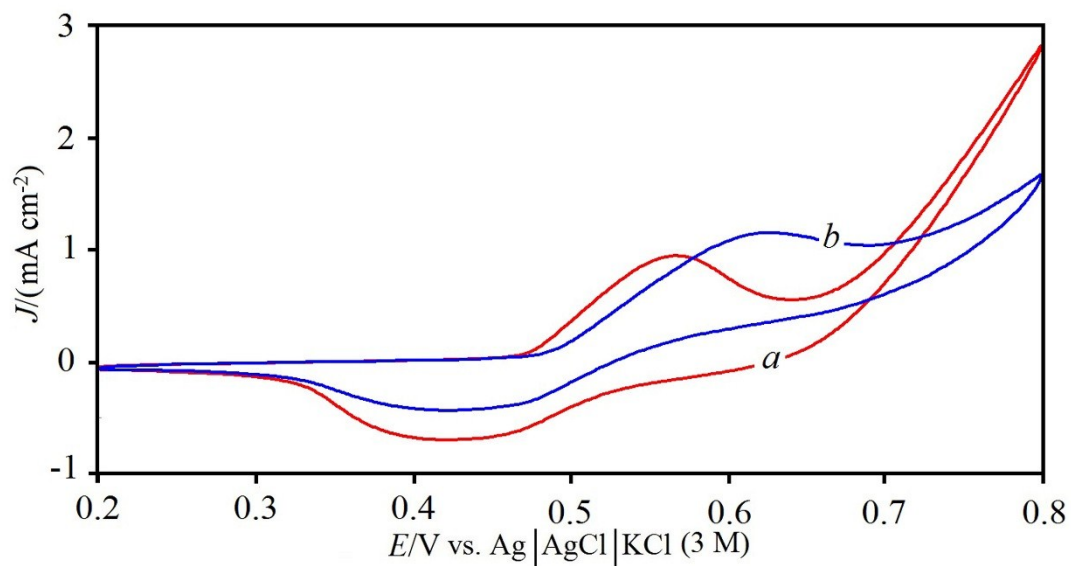

**Fig. S3** The cyclic voltammograms of Ni-ZSM-5/CPE (*a*) in the absence and (*b*) in the presence of 0.005 M glucose in 0.1 M NaOH at scan rate of  $20 \text{ mV s}^{-1}$ .

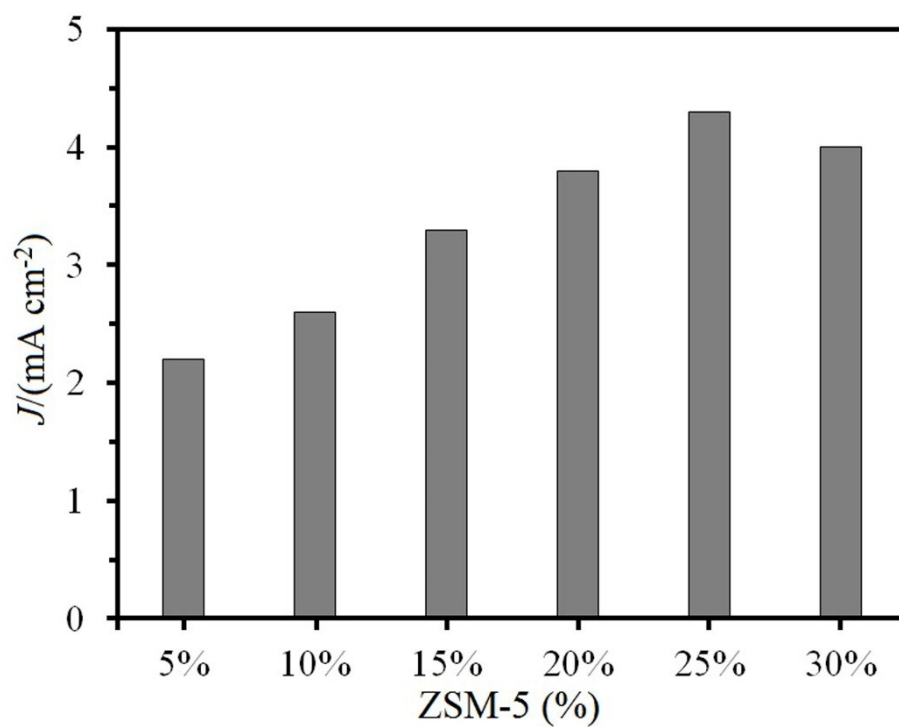

**Fig. S4** The effect of ZSM-5 percentage together with 10 wt% of MWCNTs on the current densities of electrocatalytic oxidation of 0.005 M glucose in 0.1 M NaOH at scan rate of 20 mV s<sup>-1</sup>.

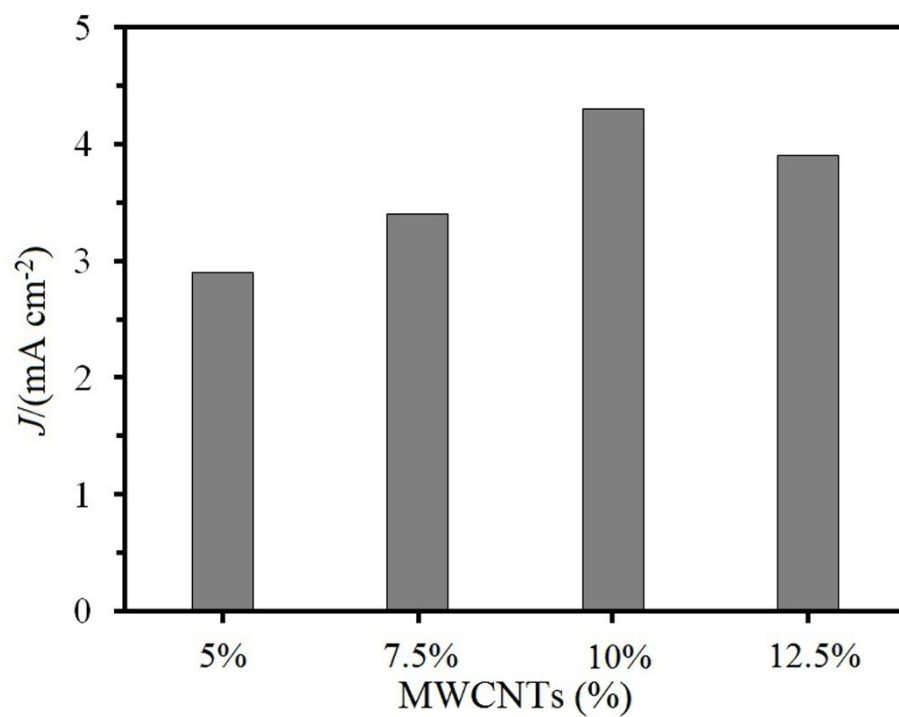

**Fig. S5** The effect of MWCNTs percentage together with 25 wt% of ZSM-5 on the current densities of electrocatalytic oxidation of 0.005 M glucose in 0.1 M NaOH at scan rate of 20 mV s<sup>-1</sup>.

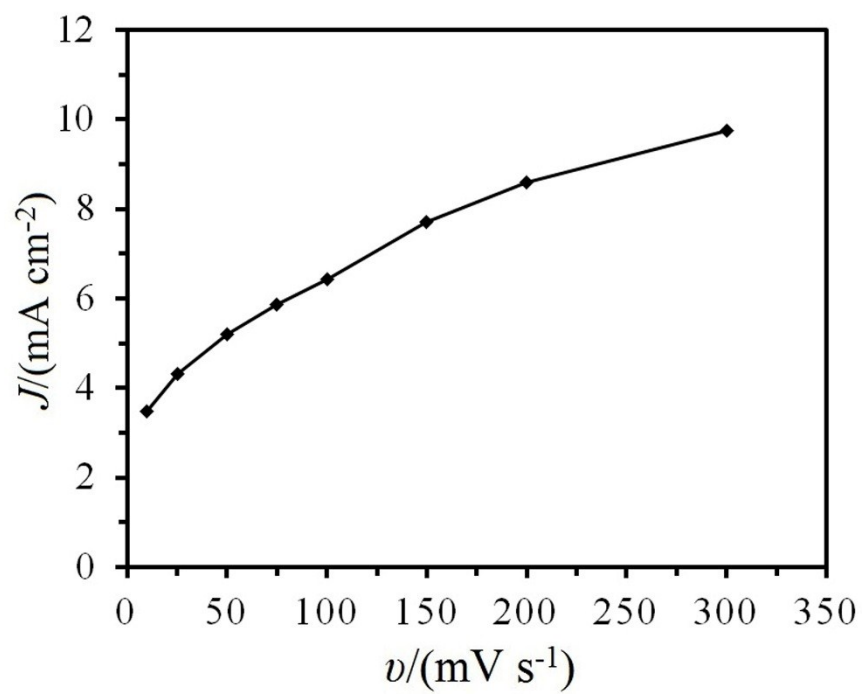

**Fig. S6** The Variation of  $J_{pa}$  vs. scan rates ( $v$ ) for electrocatalytic oxidation of 0.005 M glucose in 0.1 M NaOH at the surface of Ni-MW-ZSM-5/CPE.
